# Supplementary material for: Analysis of the Molecular Diversity Among Cronobacter Species Isolated From Filth Flies Using Targeted PCR, Pan Genomic DNA Microarray, and Whole Genome Sequencing Analyses
Source: Front Microbiol. 2020 Sep 25;11:561204. doi: 10.3389/fmicb.2020.561204 (PMC7545074; doi:10.3389/fmicb.2020.561204)
Supplement: Supplementary file 5 [file Table_5.XLSX]

## Sheet: Sheet1
Supplemental Table S5. BLAST analysis results showing thepresence or absence of virulence factors among the fly strains
	Sequence Type	4	4	4	4	4	4	4	8	8	8	8	221	93	256	7	60	569	569	546
	Species	Csak	Csak	Csak	Csak	Csak	Csak	Csak	Csak	Csak	Csak	Csak	Csak	Csak	Csak	Cmal	Cmal	Ctur	Ctur	Ctur
Gene	Putative virulence factors	Md5g	Md5s	Md6g	Md70g	Lc10g	Lc10s	Md1g	Md33g	Md33s	Md35s	Md40g	A48g	Md27gN	Ls15g	Md25g	Md99g	Sh41g	Sh41s	Md1sN
ESA_00432	COG1272: Predicted membrane protein hemolysin III homolog	A	A	A	A	A	A	A	P	P	P	P	P	P	P	A	A	A	A	A
ESA_00643	Hemolysins and related proteins containing CBS domains	P	P	P	P	P	P	P	A	A	A	A	A	P	P	A	A	A	A	A
ESA_02937	Putative hemolysin	P	P	P	P	P	P	P	P	P	P	P	P	P	P	A	A	A	A	A
ESA_03540	21 kDa hemolysin precursor	P	P	P	P	P	P	P	P	P	P	P	P	P	P	A	A	A	A	A
ESA_01234	Virulence protein MsgA	P	P	P	P	P	P	P	P	P	P	P	P	P	P	A	A	A	A	A
ESA_01907	Putative virulence effector protein	P	P	P	P	P	P	P	P	P	P	P	P	P	P	A	A	A	A	A
ESA_01909	Putative virulence factor	P	P	P	P	P	P	P	P	P	P	P	P	P	P	A	A	A	A	A
ESA_02187	Virulence factor VirK	P	P	P	P	P	P	P	P	P	P	P	P	P	P	A	A	A	A	A
ESA_02279	Virulence factor MviM	P	P	P	P	P	P	P	P	P	P	P	P	P	P	A	A	A	A	A
ESA_02461	Virulence factor VirK	A	A	A	A	A	A	A	P	P	P	P	P	P	P	A	A	A	A	A
ESA_02736	Protein of avirulence locus ImpE	P	P	P	P	P	P	P	P	P	P	P	P	P	P	A	A	A	A	A
ESA_03113	Curlin genes transcriptional activator	P	P	P	P	P	P	P	P	P	P	P	P	P	A	P	A	A	A	A
ESA_01343	Sigma-fimbriae uncharacterized paralogous subunit	P	P	P	P	P	P	P	P	P	P	P	P	P	P	A	A	A	A	A
ESA_01344	Sigma-fimbriae uncharacterized paralogous subunit	P	P	P	P	P	P	P	P	P	P	P	P	P	P	A	A	A	A	A
ESA_01345	Sigma-fimbriae chaperone protein	P	P	P	P	P	P	P	P	P	P	P	P	P	P	A	A	A	A	A
ESA_01347	Sigma-fimbriae tip adhesin	P	P	P	P	P	P	P	P	P	P	P	P	P	P	A	A	A	A	A
ESA_03515	Beta-fimbriae usher protein	P	P	P	P	P	P	P	P	P	P	P	P	P	P	A	A	A	A	A
ESA_03516	Beta-fimbriae chaperone protein	P	P	P	P	P	P	P	P	P	P	P	P	P	P	A	A	A	A	A
ESA_03512	Beta-fimbriae probable major subunit	P	P	P	P	P	P	P	P	P	P	P	P	A	A	A	A	A	A	A
ESA_03513	Beta-fimbriae probable major subunit	P	P	P	P	P	P	P	P	P	P	P	P	P	A	A	A	A	A	A
ESA_03517	Beta-fimbriae probable major subunit	P	P	P	P	P	P	P	P	P	P	P	P	A	P	A	A	A	A	A
ESA_03518	Beta-fimbriae probable major subunit	P	P	P	P	P	P	P	P	P	P	P	P	A	A	A	A	A	A	A
ESA_03519	Beta-fimbriae probable major subunit	P	P	P	P	P	P	P	P	P	P	P	P	A	P	A	A	A	A	A
ESA_03520	Beta-fimbriae probable major subunit	P	P	P	P	P	P	P	P	P	P	P	P	P	P	A	A	A	A	A
ESA_03521	Beta-fimbriae probable major subunit	P	P	P	P	P	P	P	P	P	P	P	P	A	P	A	A	A	A	A
ESA_01705	Xylanase	P	P	P	P	P	P	P	P	P	P	P	P	P	P	A	A	A	A	A
ESA_03992	Endo-12C4-beta-xylanase A precursor;Ontology_term=KEGG_ENZYME:3.2.1.8	P	P	P	P	P	P	P	P	P	P	P	P	P	P	A	A	A	A	A
ESA_04153	Xyloside transporter XynT	P	P	P	P	P	P	P	P	P	P	P	P	P	P	A	A	A	A	A
ESA_02101	Xyloside transporter XynT	P	P	P	P	P	P	P	P	P	P	P	P	P	P	A	A	A	A	A
ESA_02100	Beta-xylosidase;Ontology_term=KEGG_ENZYME:3.2.1.37	P	P	P	P	P	P	P	P	P	P	P	P	A	P	A	A	A	A	A
ESA_04154	Alpha-xylosidase;Ontology_term=KEGG_ENZYME:3.2.1.-	P	P	P	P	P	P	P	P	P	P	P	P	P	P	A	A	A	A	A
ESA_04158	Xylose activator XylR (AraC family)	P	P	P	P	P	P	P	P	P	P	P	P	P	P	A	A	A	A	A
ESA_04160	D-xylose transport ATP-binding protein XylG	P	P	P	P	P	P	P	P	P	P	P	P	P	P	A	A	A	A	A
ESA_04161	Xylose ABC transporter2C periplasmic xylose-binding protein XylF	P	P	P	P	P	P	P	P	P	P	P	P	P	P	A	A	A	A	A
ESA_04162	Xylose isomerase;Ontology_term=KEGG_ENZYME:5.3.1.5	P	P	P	P	P	P	P	P	P	P	P	P	P	P	A	A	A	A	A
ESA_04163	Xylulose kinase;Ontology_term=KEGG_ENZYME:2.7.1.17	A	A	A	A	A	A	A	P	P	P	P	P	A	A	A	A	A	A	A
ESA_03169	1-deoxy-D-xylulose 5-phosphate reductoisomerase;Ontology_term=KEGG_ENZYME:1.1.1.267	P	P	P	P	P	P	P	P	P	P	P	P	P	P	A	A	A	A	A
ESA_02882	1-deoxy-D-xylulose 5-phosphate synthase;Ontology_term=KEGG_ENZYME:2.2.1.7	P	P	P	P	P	P	P	A	A	A	A	A	P	P	A	A	A	A	A
