# Supplementary material for: Analysis of the Molecular Diversity Among Cronobacter Species Isolated From Filth Flies Using Targeted PCR, Pan Genomic DNA Microarray, and Whole Genome Sequencing Analyses
Source: Front Microbiol. 2020 Sep 25;11:561204. doi: 10.3389/fmicb.2020.561204 (PMC7545074; doi:10.3389/fmicb.2020.561204)
Supplement: Supplementary file 6 [file Table_6.XLSX]

## Sheet: Sheet1
Supplemental Table S6. C. sakazakii BAA-894 Genebank locus tag, Start, Stop , and strand identification of the 2000 core genes used in this study
C.sakazakii BAA GenBank locus tag	Start	Stop	Strand
ESA_RS15370	3279517	3279038	+
ESA_RS19230	4122476	4123396	-
ESA_RS03325	704281	702737	+
ESA_RS06635	1395025	1394681	+
ESA_RS17555	3755907	3755134	+
ESA_RS21745	1610701	1610874	-
ESA_RS13640	2916955	2918043	-
ESA_RS01810	373437	372937	+
ESA_RS08020	1689753	1687318	+
ESA_RS09130	1932835	1933443	-
ESA_RS13305	2842362	2841259	+
ESA_RS05215	1100665	1099304	+
ESA_RS06725	1412689	1413759	-
ESA_RS03920	832522	834201	-
ESA_RS02425	516792	517397	-
ESA_RS11600	2476115	2474997	+
ESA_RS05040	1060789	1061562	-
ESA_RS09850	2093123	2093950	-
ESA_RS04135	876063	876845	-
ESA_RS15000	3186320	3185829	+
ESA_RS12910	2751706	2749745	+
ESA_RS08885	1876012	1877199	-
ESA_RS15340	3273008	3270546	+
ESA_RS21995	2753482	2753634	-
ESA_RS13190	2818268	2817951	+
ESA_RS12990	2769510	2770301	-
ESA_RS02675	565267	563117	+
ESA_RS13555	2897776	2896799	+
ESA_RS00290	47185	48318	-
ESA_RS09555	2020818	2022098	-
ESA_RS12360	2634123	2633641	+
ESA_RS16230	3472001	3473371	-
ESA_RS18510	3962138	3963130	-
ESA_RS07225	1529108	1529872	-
ESA_RS17260	3688442	3687726	+
ESA_RS01285	256057	257187	-
ESA_RS06380	1344285	1345760	-
ESA_RS06750	1418318	1418929	-
ESA_RS10260	2176768	2176115	+
ESA_RS05685	1210287	1209376	+
ESA_RS18810	4035168	4034551	+
ESA_RS15140	3222800	3223414	-
ESA_RS15525	3319528	3317939	+
ESA_RS08280	1745708	1744515	+
ESA_RS00590	116571	116236	+
ESA_RS20250	4355792	4353882	+
ESA_RS19430	4168344	4170269	-
ESA_RS00905	182458	182150	+
ESA_RS18500	3961436	3960996	+
ESA_RS10145	2149256	2150626	-
ESA_RS02085	435417	434479	+
ESA_RS03220	680841	681980	-
ESA_RS07255	1534140	1533385	+
ESA_RS18155	3890067	3889045	+
ESA_RS09795	2083355	2084215	-
ESA_RS01885	392429	393088	-
ESA_RS03515	751795	750668	+
ESA_RS03080	649758	650495	-
ESA_RS16215	3468822	3469187	-
ESA_RS18435	3948598	3946769	+
ESA_RS11900	2537869	2539341	-
ESA_RS03070	647836	648219	-
ESA_RS20260	4356470	4358275	-
ESA_RS11035	2333790	2331886	+
ESA_RS14575	3085730	3084534	+
ESA_RS05970	1263551	1264099	-
ESA_RS11480	2442397	2443209	-
ESA_RS18360	3933635	3933153	+
ESA_RS09390	1984911	1986590	-
ESA_RS10285	2182776	2181982	+
ESA_RS14935	3171461	3170541	+
ESA_RS09800	2084776	2084240	+
ESA_RS06685	1403960	1404619	-
ESA_RS07160	1512748	1511153	+
ESA_RS00265	41874	43505	-
ESA_RS19760	4244557	4245798	-
ESA_RS19755	4242858	4244123	-
ESA_RS13360	2855240	2852514	+
ESA_RS14945	3174055	3172988	+
ESA_RS01450	299964	300503	-
ESA_RS10945	2313934	2314263	-
ESA_RS03170	668092	666620	+
ESA_RS15760	3370118	3371383	-
ESA_RS16225	3470412	3471929	-
ESA_RS19085	4089612	4088962	+
ESA_RS07865	1656278	1655211	+
ESA_RS00685	139309	139785	-
ESA_RS18350	3932473	3932147	+
ESA_RS03960	839148	839807	-
ESA_RS17300	3695360	3696100	-
ESA_RS02245	474103	474912	-
ESA_RS18495	3960615	3958726	+
ESA_RS04080	865872	864868	+
ESA_RS03345	712678	713844	-
ESA_RS05255	1114147	1112795	+
ESA_RS14745	3124780	3123854	+
ESA_RS02660	560595	559525	+
ESA_RS05590	1191786	1190332	+
ESA_RS07700	1616295	1617365	-
ESA_RS01505	308359	307394	+
ESA_RS19260	4129362	4129069	+
ESA_RS03855	817819	819057	-
ESA_RS03680	789746	788547	+
ESA_RS03355	715306	716424	-
ESA_RS17265	3689347	3688442	+
ESA_RS12805	2723711	2724430	-
ESA_RS13470	2879288	2878587	+
ESA_RS02685	565892	565647	+
ESA_RS02300	486408	485563	+
ESA_RS06965	1468317	1472063	-
ESA_RS01405	288885	291023	-
ESA_RS00965	191825	190857	+
ESA_RS16030	3431191	3429038	+
ESA_RS03895	827641	828882	-
ESA_RS06705	1408527	1406965	+
ESA_RS07365	1557538	1558419	-
ESA_RS15380	3281241	3280594	+
ESA_RS09625	2046568	2043512	+
ESA_RS09560	2029751	2022681	+
ESA_RS09675	2061759	2060443	+
ESA_RS07340	1553455	1553679	-
ESA_RS08970	1896163	1896894	-
ESA_RS15630	3333513	3335804	-
ESA_RS11370	2421163	2420840	+
ESA_RS06390	1347865	1348503	-
ESA_RS19180	4110076	4108820	+
ESA_RS08835	1864789	1863845	+
ESA_RS03115	657224	658189	-
ESA_RS19895	4269770	4271965	-
ESA_RS10890	2303993	2303820	+
ESA_RS08740	1840753	1843740	-
ESA_RS00725	145880	146197	-
ESA_RS03670	786121	787185	-
ESA_RS09655	2055887	2056933	-
ESA_RS07800	1643743	1643312	+
ESA_RS19380	4152656	4153669	-
ESA_RS16020	3428064	3428525	-
ESA_RS15115	3218740	3219734	-
ESA_RS13665	2923501	2922629	+
ESA_RS03660	783600	785105	-
ESA_RS05230	1104447	1103032	+
ESA_RS00495	93813	94157	-
ESA_RS19715	4235096	4235461	-
ESA_RS07380	1560342	1560998	-
ESA_RS05030	1059464	1058541	+
ESA_RS09155	1938081	1936927	+
ESA_RS02555	540010	540507	-
ESA_RS15950	3411952	3414807	-
ESA_RS06950	1464394	1463744	+
ESA_RS09125	1931227	1932726	-
ESA_RS18560	3975565	3974171	+
ESA_RS02090	435721	436983	-
ESA_RS02400	511022	511756	-
ESA_RS13610	2911206	2911790	-
ESA_RS17755	3803361	3803675	-
ESA_RS04205	886668	886919	-
ESA_RS02265	477328	478245	-
ESA_RS07220	1528908	1528315	+
ESA_RS16690	3566142	3564175	+
ESA_RS00885	176747	177934	-
ESA_RS00610	121805	122641	-
ESA_RS14530	3075898	3074756	+
ESA_RS15305	3264011	3262710	+
ESA_RS01935	402382	405255	-
ESA_RS12845	2735653	2734691	+
ESA_RS06930	1454941	1459008	-
ESA_RS09205	1946359	1946940	-
ESA_RS04890	1030131	1031321	-
ESA_RS06430	1354988	1355362	-
ESA_RS16500	3524543	3523728	+
ESA_RS00520	97624	98292	-
ESA_RS00240	31621	33219	-
ESA_RS17255	3687586	3685424	+
ESA_RS07320	1549829	1548864	+
ESA_RS07930	1670751	1672019	-
ESA_RS01230	247736	248629	-
ESA_RS10380	2202309	2201347	+
ESA_RS02140	448588	447548	+
ESA_RS13285	2839118	2838597	+
ESA_RS01715	353311	355491	-
ESA_RS11055	2338839	2337829	+
ESA_RS03910	831614	830742	+
ESA_RS09250	1954793	1953882	+
ESA_RS03350	714263	715279	-
ESA_RS07835	1649144	1650469	-
ESA_RS17105	3656330	3657493	-
ESA_RS03675	787185	788429	-
ESA_RS02950	621857	620697	+
ESA_RS03990	843742	844203	-
ESA_RS03820	811267	812682	-
ESA_RS15745	3366667	3367776	-
ESA_RS01985	412726	413622	-
ESA_RS18255	3911016	3910084	+
ESA_RS11255	2390539	2389196	+
ESA_RS13530	2891585	2893303	-
ESA_RS18565	3976280	3975579	+
ESA_RS09135	1934344	1933484	+
ESA_RS05315	1129647	1130864	-
ESA_RS17710	3794199	3793522	+
ESA_RS22475	3799502	3799831	-
ESA_RS04970	1046726	1047883	-
ESA_RS00900	182014	181739	+
ESA_RS19120	4096022	4096600	-
ESA_RS19445	4174445	4173513	+
ESA_RS08015	1687308	1686691	+
ESA_RS02250	475356	474913	+
ESA_RS11565	2462489	2464852	-
ESA_RS14635	3098320	3099120	-
ESA_RS17735	3798358	3799476	-
ESA_RS05675	1207458	1208891	-
ESA_RS06945	1462332	1463747	-
ESA_RS00975	193356	192499	+
ESA_RS11345	2414728	2415696	-
ESA_RS06215	1309021	1310169	-
ESA_RS08680	1828614	1829528	-
ESA_RS10190	2160821	2159997	+
ESA_RS14660	3105289	3103304	+
ESA_RS19125	4096597	4097550	-
ESA_RS12755	2713159	2711789	+
ESA_RS05250	1112489	1112785	-
ESA_RS11455	2435720	2437402	-
ESA_RS12175	2595630	2596307	-
ESA_RS02340	495778	496569	-
ESA_RS08840	1865804	1864791	+
ESA_RS14360	3041680	3040949	+
ESA_RS08875	1872962	1874365	-
ESA_RS10435	2211399	2212058	-
ESA_RS16785	3586550	3588004	-
ESA_RS09695	2065125	2064574	+
ESA_RS06415	1351816	1353879	-
ESA_RS05150	1084608	1086293	-
ESA_RS03455	739813	739457	+
ESA_RS11075	2341779	2342570	-
ESA_RS19750	4242739	4241246	+
ESA_RS12980	2767651	2768688	-
ESA_RS07715	1620976	1622007	-
ESA_RS03790	809646	809861	-
ESA_RS03390	722904	721879	+
ESA_RS02380	505698	506369	-
ESA_RS11840	2527874	2526834	+
ESA_RS07085	1497497	1497174	+
ESA_RS08825	1863031	1861604	+
ESA_RS05885	1245865	1246278	-
ESA_RS21855	1998994	1999179	-
ESA_RS10215	2165040	2168486	-
ESA_RS06975	1473592	1474302	-
ESA_RS20220	4347950	4346934	+
ESA_RS07960	1677784	1676534	+
ESA_RS04915	1034267	1035400	-
ESA_RS19830	4257422	4258162	-
ESA_RS05245	1111910	1110663	+
ESA_RS11215	2379038	2377953	+
ESA_RS20160	4334593	4334267	+
ESA_RS19300	4136152	4136790	-
ESA_RS18550	3972246	3973175	-
ESA_RS05725	1217098	1216310	+
ESA_RS20140	4329813	4328983	+
ESA_RS10550	2234632	2233145	+
ESA_RS09600	2038934	2038188	+
ESA_RS15030	3194268	3194873	-
ESA_RS11880	2535811	2535119	+
ESA_RS02680	565650	565249	+
ESA_RS08605	1812312	1813310	-
ESA_RS08525	1797719	1797916	-
ESA_RS08285	1745916	1746812	-
ESA_RS00325	55444	56178	-
ESA_RS19980	4295232	4296011	-
ESA_RS11740	2507945	2509675	-
ESA_RS04935	1039866	1039009	+
ESA_RS02630	554636	553098	+
ESA_RS09805	2084935	2085603	-
ESA_RS03575	764444	766723	-
ESA_RS19705	4234221	4232005	+
ESA_RS11700	2498212	2496032	+
ESA_RS01045	209538	211133	-
ESA_RS03485	744709	745743	-
ESA_RS04945	1041108	1041974	-
ESA_RS08290	1747050	1746838	+
ESA_RS19990	4296644	4296408	+
ESA_RS19330	4141923	4143125	-
ESA_RS03465	741514	742578	-
ESA_RS13090	2792427	2791141	+
ESA_RS11155	2365442	2365020	+
ESA_RS07990	1683796	1682891	+
ESA_RS00335	58991	58524	+
ESA_RS09145	1936488	1935832	+
ESA_RS07680	1611196	1612179	-
ESA_RS09920	2108538	2107495	+
ESA_RS10250	2175301	2174276	+
ESA_RS02165	451780	454026	-
ESA_RS09895	2103492	2102272	+
ESA_RS11550	2459037	2459795	-
ESA_RS08690	1830890	1831867	-
ESA_RS12585	2684273	2683560	+
ESA_RS20275	4359440	4359222	+
ESA_RS19950	4288119	4285414	+
ESA_RS09660	2058457	2057009	+
ESA_RS12155	2588604	2590286	-
ESA_RS06870	1442725	1443534	-
ESA_RS10480	2219176	2219736	-
ESA_RS03460	741291	739825	+
ESA_RS11490	2444642	2445382	-
ESA_RS08630	1817265	1819382	-
ESA_RS12375	2637544	2638575	-
ESA_RS08870	1872226	1872555	-
ESA_RS13660	2922184	2922651	-
ESA_RS19535	4193919	4195121	-
ESA_RS02420	515365	516792	-
ESA_RS12720	2704669	2705685	-
ESA_RS18800	4032578	4031955	+
ESA_RS02365	502294	503847	-
ESA_RS01090	222607	221399	+
ESA_RS16890	3611552	3612850	-
ESA_RS16115	3452280	3453581	-
ESA_RS16305	3487029	3486526	+
ESA_RS00375	67859	68368	-
ESA_RS19840	4258755	4260518	-
ESA_RS19070	4086794	4086384	+
ESA_RS05530	1177868	1176717	+
ESA_RS08705	1835218	1834643	+
ESA_RS03520	752156	751800	+
ESA_RS00670	135997	135650	+
ESA_RS01835	381276	380518	+
ESA_RS18865	4047484	4046888	+
ESA_RS15940	3388500	3390011	-
ESA_RS14725	3120298	3121152	-
ESA_RS01215	245372	244863	+
ESA_RS03975	840766	841245	-
ESA_RS16430	3513202	3513864	-
ESA_RS18710	4011217	4012023	-
ESA_RS05510	1171803	1171024	+
ESA_RS11065	2339656	2340627	-
ESA_RS01785	369699	369283	+
ESA_RS16065	3439469	3441487	-
ESA_RS08080	1699881	1699135	+
ESA_RS15840	3387131	3386049	+
ESA_RS06710	1408739	1409458	-
ESA_RS09105	1927632	1928684	-
ESA_RS05220	1101614	1100892	+
ESA_RS03720	795033	795935	-
ESA_RS03370	718480	719661	-
ESA_RS07705	1619151	1617346	+
ESA_RS02945	619788	620666	-
ESA_RS14750	3124889	3125551	-
ESA_RS11520	2450212	2451537	-
ESA_RS07830	1648450	1648980	-
ESA_RS02100	438272	439609	-
ESA_RS19470	4181453	4180554	+
ESA_RS19690	4228899	4229882	-
ESA_RS16965	3624151	3624468	-
ESA_RS07200	1520334	1520083	+
ESA_RS17415	3725486	3723465	+
ESA_RS13250	2831272	2832186	-
ESA_RS09400	1987484	1987828	-
ESA_RS21425	250613	250819	-
ESA_RS15670	3350208	3348778	+
ESA_RS22135	3368469	3368305	+
ESA_RS00865	172235	174700	-
ESA_RS07880	1659063	1660574	-
ESA_RS12860	2739458	2738325	+
ESA_RS12405	2643371	2644552	-
ESA_RS09070	1921493	1920495	+
ESA_RS19185	4112280	4110250	+
ESA_RS09965	2117011	2116265	+
ESA_RS15710	3357608	3358876	-
ESA_RS18720	4012726	4013595	-
ESA_RS14985	3183605	3182664	+
ESA_RS16010	3426385	3426864	-
ESA_RS15330	3269611	3268322	+
ESA_RS08905	1880754	1882364	-
ESA_RS14495	3064870	3063566	+
ESA_RS09915	2107491	2105545	+
ESA_RS07725	1626745	1623224	+
ESA_RS12425	2647321	2648316	-
ESA_RS15395	3284122	3282188	+
ESA_RS12795	2721048	2721503	-
ESA_RS08490	1791565	1790264	+
ESA_RS10950	2314541	2314260	+
ESA_RS03430	735342	734701	+
ESA_RS01000	197644	198387	-
ESA_RS07875	1657675	1659018	-
ESA_RS01840	381557	383548	-
ESA_RS03730	797111	797941	-
ESA_RS13695	2930865	2928886	+
ESA_RS11145	2363280	2364059	-
ESA_RS12785	2719170	2720024	-
ESA_RS11160	2365569	2366048	-
ESA_RS05535	1178127	1179278	-
ESA_RS07330	1552550	1551564	+
ESA_RS10805	2285866	2284583	+
ESA_RS19975	4295192	4294515	+
ESA_RS03885	826113	824389	+
ESA_RS19850	4261564	4262604	-
ESA_RS15210	3242626	3243522	-
ESA_RS02880	608607	607729	+
ESA_RS13670	2923601	2924107	-
ESA_RS15065	3203444	3202563	+
ESA_RS03400	724531	725997	-
ESA_RS14490	3063573	3063259	+
ESA_RS15530	3320297	3319620	+
ESA_RS09980	2121088	2120879	+
ESA_RS04460	949888	950919	-
ESA_RS07175	1515482	1516084	-
ESA_RS13320	2843871	2844749	-
ESA_RS11825	2524951	2524268	+
ESA_RS05610	1195036	1195953	-
ESA_RS06645	1397136	1397831	-
ESA_RS02335	493443	495677	-
ESA_RS04130	875217	875786	-
ESA_RS11040	2335913	2333796	+
ESA_RS08880	1874378	1875898	-
ESA_RS08155	1719338	1720036	-
ESA_RS16845	3601853	3602950	-
ESA_RS15455	3301583	3302584	-
ESA_RS13375	2860068	2858749	+
ESA_RS14740	3123857	3123087	+
ESA_RS15325	3267497	3268270	-
ESA_RS02975	625897	626625	-
ESA_RS05080	1070004	1071137	-
ESA_RS06270	1322310	1322927	-
ESA_RS12255	2616614	2617762	-
ESA_RS08950	1892299	1890764	+
ESA_RS01725	356482	355901	+
ESA_RS02890	610682	609393	+
ESA_RS17545	3753673	3752300	+
ESA_RS00890	178025	179659	-
ESA_RS11835	2526837	2525686	+
ESA_RS15170	3231843	3230695	+
ESA_RS12120	2584031	2583099	+
ESA_RS15500	3312859	3312080	+
ESA_RS18245	3908433	3908759	-
ESA_RS13315	2842970	2843530	-
ESA_RS18850	4045288	4044425	+
ESA_RS09950	2113846	2113433	+
ESA_RS01030	203446	205179	-
ESA_RS02305	486478	487023	-
ESA_RS20285	4360655	4361377	-
ESA_RS12160	2590307	2592355	-
ESA_RS13085	2790011	2790871	-
ESA_RS13075	2788870	2789181	-
ESA_RS07785	1640537	1639113	+
ESA_RS10965	2316638	2316231	+
ESA_RS03185	674259	675032	-
ESA_RS15075	3205471	3206973	-
ESA_RS13275	2835649	2837511	-
ESA_RS02220	470928	469597	+
ESA_RS12095	2579855	2578860	+
ESA_RS21685	1511149	1508585	+
ESA_RS15055	3200981	3201682	-
ESA_RS15505	3314474	3313197	+
ESA_RS12500	2663214	2661949	+
ESA_RS15335	3270544	3269615	+
ESA_RS12395	2640345	2642246	-
ESA_RS13480	2880759	2880544	+
ESA_RS14720	3119491	3120285	-
ESA_RS06350	1337961	1337206	+
ESA_RS10135	2147445	2148554	-
ESA_RS08960	1893954	1895336	-
ESA_RS22220	3675168	3674269	+
ESA_RS04370	925070	923553	+
ESA_RS08320	1751551	1752024	-
ESA_RS15495	3311976	3310654	+
ESA_RS13550	2896789	2896010	+
ESA_RS09490	2007415	2006810	+
ESA_RS07100	1500465	1500169	+
ESA_RS17745	3801094	3801918	-
ESA_RS18735	4016994	4015312	+
ESA_RS11395	2424227	2424895	-
ESA_RS12335	2628486	2630027	-
ESA_RS09650	2054899	2055732	-
ESA_RS04350	919633	920490	-
ESA_RS03180	672871	674262	-
ESA_RS07905	1665440	1666108	-
ESA_RS09095	1924730	1925308	-
ESA_RS13490	2882523	2881417	+
ESA_RS06375	1343931	1343065	+
ESA_RS03985	843188	843745	-
ESA_RS18555	3973191	3974174	-
ESA_RS14385	3045987	3045217	+
ESA_RS00770	157041	155995	+
ESA_RS01170	236709	234574	+
ESA_RS01670	344082	344873	-
ESA_RS18330	3928539	3929903	-
ESA_RS17140	3663004	3662243	+
ESA_RS09620	2043515	2043105	+
ESA_RS14655	3101813	3103093	-
ESA_RS03580	767634	766849	+
ESA_RS19280	4132958	4131678	+
ESA_RS04145	877937	878623	-
ESA_RS17365	3713007	3711877	+
ESA_RS02445	518974	519453	-
ESA_RS05090	1072064	1072795	-
ESA_RS09780	2081689	2080931	+
ESA_RS16530	3528442	3529167	-
ESA_RS13365	2857142	2855325	+
ESA_RS06940	1462154	1461603	+
ESA_RS14955	3176612	3175296	+
ESA_RS13390	2862691	2863905	-
ESA_RS19855	4262726	4263421	-
ESA_RS06920	1453252	1454133	-
ESA_RS17765	3807352	3805229	+
ESA_RS09470	2002157	2001615	+
ESA_RS07030	1483047	1484060	-
ESA_RS05545	1180040	1181098	-
ESA_RS12995	2770283	2770957	-
ESA_RS16280	3484366	3483323	+
ESA_RS07170	1514588	1515466	-
ESA_RS17790	3810451	3810242	+
ESA_RS16650	3556808	3558175	-
ESA_RS08650	1822894	1821908	+
ESA_RS18875	4049257	4048046	+
ESA_RS06370	1342935	1341493	+
ESA_RS11430	2432299	2431187	+
ESA_RS02150	449785	449072	+
ESA_RS09115	1929317	1930003	-
ESA_RS04385	926642	927322	-
ESA_RS15465	3305593	3304211	+
ESA_RS20060	4316765	4314213	+
ESA_RS10790	2282537	2280213	+
ESA_RS17635	3779284	3780318	-
ESA_RS11785	2517169	2516924	+
ESA_RS00880	176090	176746	-
ESA_RS22285	4032577	4032768	-
ESA_RS15365	3279019	3278327	+
ESA_RS12505	2663613	2664989	-
ESA_RS14765	3130677	3129115	+
ESA_RS00260	37699	41382	-
ESA_RS16110	3451809	3450397	+
ESA_RS19040	4080538	4081440	-
ESA_RS06690	1404708	1405154	-
ESA_RS07940	1673046	1673405	-
ESA_RS17230	3681480	3681950	-
ESA_RS08965	1895341	1896087	-
ESA_RS15720	3361529	3359469	+
ESA_RS13635	2915338	2916807	-
ESA_RS13100	2794807	2793029	+
ESA_RS16790	3588013	3588894	-
ESA_RS02325	492035	489276	+
ESA_RS12855	2738204	2736939	+
ESA_RS12555	2674185	2674727	-
ESA_RS06895	1447480	1447235	+
ESA_RS06915	1451992	1453242	-
ESA_RS03695	792685	791810	+
ESA_RS13350	2850565	2851146	-
ESA_RS08530	1797918	1798682	-
ESA_RS15695	3355649	3354582	+
ESA_RS07625	1600770	1601768	-
ESA_RS06700	1406828	1406295	+
ESA_RS01765	365081	364374	+
ESA_RS03735	797941	798810	-
ESA_RS18690	4008255	4007014	+
ESA_RS04895	1031958	1031386	+
ESA_RS01300	260566	259241	+
ESA_RS02155	450550	449864	+
ESA_RS00570	110332	112188	-
ESA_RS15040	3196594	3198258	-
ESA_RS04835	1016376	1017572	-
ESA_RS15895	3399614	3399162	+
ESA_RS17875	3829394	3828786	+
ESA_RS07605	1595927	1597324	-
ESA_RS09945	2113392	2113114	+
ESA_RS10050	2131786	2132022	-
ESA_RS19385	4155660	4153975	+
ESA_RS08610	1813339	1814223	-
ESA_RS03125	659038	659943	-
ESA_RS06115	1289330	1290130	-
ESA_RS18600	3983104	3983373	-
ESA_RS06925	1454143	1454931	-
ESA_RS00245	33259	34566	-
ESA_RS14860	3155141	3156031	-
ESA_RS08790	1857159	1855963	+
ESA_RS11475	2442216	2440765	+
ESA_RS07630	1602472	1601750	+
ESA_RS11505	2448055	2446844	+
ESA_RS00700	142150	142503	-
ESA_RS03505	749692	750390	-
ESA_RS15300	3262086	3262652	-
ESA_RS11895	2537006	2537797	-
ESA_RS10855	2298286	2299374	-
ESA_RS14305	3029819	3029430	+
ESA_RS06580	1384879	1384301	+
ESA_RS14850	3154493	3153639	+
ESA_RS06285	1326616	1327062	-
ESA_RS15885	3397659	3397240	+
ESA_RS13280	2837581	2838555	-
ESA_RS18385	3938398	3937061	+
ESA_RS04185	884148	884699	-
ESA_RS08895	1878962	1879906	-
ESA_RS15290	3259793	3258654	+
ESA_RS02105	439617	441044	-
ESA_RS19275	4131607	4130633	+
ESA_RS19215	4118992	4120314	-
ESA_RS08920	1885347	1884529	+
ESA_RS14440	3056236	3056889	-
ESA_RS14690	3114630	3115160	-
ESA_RS05035	1059537	1060496	-
ESA_RS12410	2644697	2645911	-
ESA_RS02255	476562	475357	+
ESA_RS01975	411673	412089	-
ESA_RS04325	914880	915350	-
ESA_RS11930	2546039	2544987	+
ESA_RS02195	457479	457811	-
ESA_RS15860	3390657	3393512	-
ESA_RS06745	1418188	1417244	+
ESA_RS10825	2289879	2289457	+
ESA_RS08075	1699046	1698360	+
ESA_RS19285	4134066	4133125	+
ESA_RS18670	4003121	4001715	+
ESA_RS06560	1379009	1378047	+
ESA_RS09640	2051969	2050581	+
ESA_RS02545	537949	538671	-
ESA_RS11725	2506040	2504616	+
ESA_RS04020	849786	851939	-
ESA_RS03890	827400	826159	+
ESA_RS08500	1793386	1792172	+
ESA_RS14310	3031124	3029877	+
ESA_RS01795	371323	370376	+
ESA_RS11080	2342567	2343334	-
ESA_RS13745	2943098	2942088	+
ESA_RS20085	4318987	4320240	-
ESA_RS01180	237990	238520	-
ESA_RS07970	1678933	1680150	-
ESA_RS03420	732399	730858	+
ESA_RS15155	3226297	3226064	+
ESA_RS02535	536357	537124	-
ESA_RS16085	3444471	3445469	-
ESA_RS17270	3690048	3689344	+
ESA_RS14790	3134599	3134979	-
ESA_RS19515	4190117	4190869	-
ESA_RS16710	3569896	3568451	+
ESA_RS02875	607642	605981	+
ESA_RS08325	1752856	1751984	+
ESA_RS04045	855503	856327	-
ESA_RS14705	3116578	3117474	-
ESA_RS07335	1552718	1553389	-
ESA_RS11915	2541642	2542790	-
ESA_RS13400	2868002	2867091	+
ESA_RS07945	1673392	1673721	-
ESA_RS04315	912382	913839	-
ESA_RS12725	2707279	2705894	+
ESA_RS03705	793762	793364	+
ESA_RS07110	1501866	1501465	+
ESA_RS08830	1863855	1863049	+
ESA_RS01280	255397	255894	-
ESA_RS11275	2396591	2397559	-
ESA_RS08675	1827769	1828614	-
ESA_RS06815	1432804	1432220	+
ESA_RS04805	1011824	1010061	+
ESA_RS09935	2111363	2112379	-
ESA_RS15870	3395025	3395528	-
ESA_RS10195	2161743	2160823	+
ESA_RS10460	2216265	2215612	+
ESA_RS07710	1619423	1620943	-
ESA_RS16575	3537778	3536843	+
ESA_RS03495	746715	747575	-
ESA_RS07130	1506212	1505805	+
ESA_RS03905	830648	829680	+
ESA_RS16670	3561604	3561867	-
ESA_RS03530	756171	753055	+
ESA_RS03965	839847	840578	-
ESA_RS17310	3697317	3698513	-
ESA_RS09870	2097171	2096689	+
ESA_RS10065	2133093	2133746	-
ESA_RS18000	3854712	3852781	+
ESA_RS15880	3397192	3396428	+
ESA_RS03160	664067	665434	-
ESA_RS05240	1110663	1107541	+
ESA_RS10835	2291919	2295881	-
ESA_RS11995	2554910	2553672	+
ESA_RS01655	341979	341614	+
ESA_RS05740	1218505	1218128	+
ESA_RS16655	3558266	3559333	-
ESA_RS17155	3665552	3663912	+
ESA_RS06845	1438893	1438270	+
ESA_RS19320	4140980	4140417	+
ESA_RS17990	3852350	3847803	+
ESA_RS17445	3733228	3732299	+
ESA_RS20105	4323672	4324490	-
ESA_RS15355	3276823	3275465	+
ESA_RS17430	3727947	3728840	-
ESA_RS15540	3321140	3320730	+
ESA_RS03425	734463	732403	+
ESA_RS03275	690204	692054	-
ESA_RS01890	393358	394596	-
ESA_RS04005	847665	846304	+
ESA_RS12970	2765252	2764992	+
ESA_RS06550	1377169	1376318	+
ESA_RS06120	1290105	1291529	-
ESA_RS06110	1288173	1289153	-
ESA_RS01945	407887	406454	+
ESA_RS07235	1530335	1531504	-
ESA_RS11935	2546364	2546756	-
ESA_RS12810	2724843	2724433	+
ESA_RS13405	2868090	2869040	-
ESA_RS14470	3062015	3061593	+
ESA_RS12975	2767293	2765392	+
ESA_RS17655	3783579	3784511	-
ESA_RS18525	3966297	3968168	-
ESA_RS08850	1868774	1867353	+
ESA_RS03395	724360	722987	+
ESA_RS01700	349652	350479	-
ESA_RS01805	372848	372141	+
ESA_RS04140	877081	877863	-
ESA_RS19700	4230452	4231738	-
ESA_RS16920	3617272	3616499	+
ESA_RS13750	2944157	2943177	+
ESA_RS16310	3487547	3487023	+
ESA_RS09530	2015787	2014426	+
ESA_RS14640	3099137	3099757	-
ESA_RS03690	791807	790902	+
ESA_RS17695	3789717	3791372	-
ESA_RS03145	662133	661873	+
ESA_RS03620	775814	776566	-
ESA_RS03995	844200	845399	-
ESA_RS08715	1835772	1836221	-
ESA_RS12830	2730866	2729214	+
ESA_RS01880	392261	391368	+
ESA_RS01815	374922	373528	+
ESA_RS03175	668360	672250	-
ESA_RS02550	538787	539869	-
ESA_RS10535	2230155	2227627	+
ESA_RS10860	2299374	2300072	-
ESA_RS02655	559470	558475	+
ESA_RS11620	2479721	2480608	-
ESA_RS17900	3834975	3835721	-
ESA_RS17190	3673428	3674381	-
ESA_RS04225	891285	891779	-
ESA_RS16750	3580985	3581959	-
ESA_RS14685	3114558	3112129	+
ESA_RS17180	3669605	3670423	-
ESA_RS18985	4072049	4070766	+
ESA_RS04925	1036352	1038049	-
ESA_RS09230	1950142	1950960	-
ESA_RS11610	2477196	2478779	-
ESA_RS16940	3620683	3621432	-
ESA_RS03655	783339	782251	+
ESA_RS08730	1839014	1837419	+
ESA_RS17870	3828681	3827299	+
ESA_RS16235	3473371	3474780	-
ESA_RS03880	824377	823646	+
ESA_RS01990	413645	414364	-
ESA_RS18980	4070762	4069821	+
ESA_RS04085	865995	867131	-
ESA_RS10935	2312907	2311282	+
ESA_RS07075	1495257	1496261	-
ESA_RS08855	1868972	1870381	-
ESA_RS17275	3690869	3690045	+
ESA_RS07870	1657321	1656392	+
ESA_RS03190	675029	676366	-
ESA_RS07025	1481692	1483032	-
ESA_RS19910	4275330	4276763	-
ESA_RS18785	4029480	4028791	+
ESA_RS05900	1248844	1247414	+
ESA_RS19175	4106447	4108771	-
ESA_RS00480	91476	88651	+
ESA_RS11085	2346220	2343608	+
ESA_RS11130	2361061	2360351	+
ESA_RS17145	3663566	3663006	+
ESA_RS09550	2019326	2020825	-
ESA_RS18205	3902310	3901213	+
ESA_RS05210	1099053	1098154	+
ESA_RS03095	653131	653781	-
ESA_RS14435	3055212	3056243	-
ESA_RS11875	2535119	2534061	+
ESA_RS19060	4084679	4085983	-
ESA_RS12495	2661731	2660781	+
ESA_RS02980	626755	629328	-
ESA_RS16210	3467680	3468666	-
ESA_RS13325	2845914	2844943	+
ESA_RS09815	2086660	2087250	-
ESA_RS17675	3786682	3788199	-
ESA_RS15585	3327024	3327482	-
ESA_RS06245	1318670	1316937	+
ESA_RS20115	4325205	4325963	-
ESA_RS08040	1692163	1691834	+
ESA_RS11525	2452870	2451959	+
ESA_RS13570	2900970	2903942	-
ESA_RS10155	2151453	2152958	-
ESA_RS00310	52461	54110	-
ESA_RS05615	1196055	1197008	-
ESA_RS18295	3918981	3918169	+
ESA_RS15825	3383232	3381568	+
ESA_RS12800	2721597	2723741	-
ESA_RS17885	3832022	3833170	-
ESA_RS07125	1505780	1505037	+
ESA_RS11650	2487660	2486731	+
ESA_RS03850	817462	816278	+
ESA_RS03615	774948	775817	-
ESA_RS17080	3650496	3649963	+
ESA_RS06360	1339000	1340331	-
ESA_RS15915	3383232	3381568	+
ESA_RS04400	929517	930713	-
ESA_RS00950	186762	188174	-
ESA_RS11645	2484472	2486730	-
ESA_RS17920	3838180	3837791	+
ESA_RS13710	2934564	2933299	+
ESA_RS19795	4251553	4252266	-
ESA_RS03165	665438	666073	-
ESA_RS02490	526497	527402	-
ESA_RS03605	772157	773323	-
ESA_RS16550	3531645	3532499	-
ESA_RS00775	157153	157698	-
ESA_RS13725	2940008	2939091	+
ESA_RS03335	709568	711898	-
ESA_RS11030	2331869	2330601	+
ESA_RS03330	704605	709554	-
ESA_RS11760	2512423	2513184	-
ESA_RS01035	205176	208952	-
ESA_RS02210	464186	467728	-
ESA_RS03235	684021	684998	-
ESA_RS11465	2439442	2438897	+
ESA_RS10895	2304393	2304989	-
ESA_RS14505	3067520	3065382	+
ESA_RS18730	4014074	4015015	-
ESA_RS11210	2377884	2376598	+
ESA_RS01665	343890	343114	+
ESA_RS15515	3316513	3315380	+
ESA_RS18895	4050846	4051655	-
ESA_RS04230	891792	892451	-
ESA_RS14325	3034700	3033645	+
ESA_RS11375	2421292	2421819	-
ESA_RS14370	3042922	3042206	+
ESA_RS17640	3780405	3781442	-
ESA_RS13505	2884750	2885907	-
ESA_RS08045	1692279	1692605	-
ESA_RS13790	2949803	2950081	-
ESA_RS07915	1667397	1667927	-
ESA_RS02125	443656	442640	+
ESA_RS01650	340136	341563	-
ESA_RS17595	3769111	3767453	+
ESA_RS11045	2336016	2337122	-
ESA_RS16060	3437893	3439290	-
ESA_RS09270	1959085	1960470	-
ESA_RS00250	34828	36618	-
ESA_RS08330	1752998	1754386	-
ESA_RS09265	1957712	1959031	-
ESA_RS11790	2517647	2517162	+
ESA_RS02430	517447	517770	-
ESA_RS03045	644275	641615	+
ESA_RS02970	624920	625900	-
ESA_RS13395	2863902	2867051	-
ESA_RS10815	2287885	2287055	+
ESA_RS02850	603458	603739	-
ESA_RS15060	3202446	3201676	+
ESA_RS04040	854413	855498	-
ESA_RS17795	3811424	3810582	+
ESA_RS03665	785102	786097	-
ESA_RS10140	2148609	2149238	-
ESA_RS14500	3065324	3064935	+
ESA_RS14895	3162028	3162228	-
ESA_RS17215	3678473	3677853	+
ESA_RS12780	2718341	2719111	-
ESA_RS02570	542363	544990	-
ESA_RS12920	2752877	2752500	+
ESA_RS07280	1538730	1539599	-
ESA_RS16035	3432079	3431315	+
ESA_RS09110	1928694	1929320	-
ESA_RS13700	2931078	2931335	-
ESA_RS06880	1445783	1444680	+
ESA_RS19900	4271952	4273934	-
ESA_RS16565	3534155	3533502	+
ESA_RS03595	769741	770985	-
ESA_RS08955	1892825	1893769	-
ESA_RS09500	2008196	2008546	-
ESA_RS05100	1073686	1072943	+
ESA_RS04830	1015653	1016360	-
ESA_RS09085	1923631	1924074	-
ESA_RS17865	3827302	3825455	+
ESA_RS10455	2215609	2214686	+
ESA_RS07665	1610102	1609911	+
ESA_RS17520	3747390	3748490	-
ESA_RS17100	3654130	3656319	-
ESA_RS05490	1167633	1166551	+
ESA_RS11605	2476585	2476118	+
ESA_RS20135	4328986	4328201	+
ESA_RS12515	2666860	2665619	+
ESA_RS12320	2625960	2627039	-
ESA_RS09245	1952839	1953864	-
ESA_RS00295	48321	49547	-
ESA_RS01535	316934	315456	+
ESA_RS18780	4028787	4026706	+
ESA_RS03065	647529	646840	+
ESA_RS16745	3580751	3578811	+
ESA_RS12115	2583109	2582375	+
ESA_RS09990	2122816	2122643	+
ESA_RS10485	2219865	2220911	-
ESA_RS19460	4179192	4177864	+
ESA_RS20195	4344339	4342255	+
ESA_RS19130	4097550	4099748	-
ESA_RS14845	3152666	3153619	-
ESA_RS12540	2672751	2671591	+
ESA_RS09005	1904847	1906025	-
ESA_RS09665	2059238	2058519	+
ESA_RS08050	1692761	1693975	-
ESA_RS19510	4188066	4190108	-
ESA_RS00550	107227	105269	+
ESA_RS08035	1691767	1691207	+
ESA_RS03310	700419	699646	+
ESA_RS17705	3792154	3793359	-
ESA_RS02120	442203	442679	-
ESA_RS09000	1904641	1902995	+
ESA_RS09820	2087385	2088776	-
ESA_RS01210	244501	244803	-
ESA_RS14630	3097629	3098327	-
ESA_RS15910	3380135	3381154	-
ESA_RS13580	2904433	2905845	-
ESA_RS11025	2330611	2328971	+
ESA_RS10185	2158726	2159772	-
ESA_RS06495	1366857	1368905	-
ESA_RS18635	3991479	3992852	-
ESA_RS18280	3916713	3915829	+
ESA_RS04050	856349	857146	-
ESA_RS16445	3517141	3516176	+
ESA_RS07980	1682234	1681089	+
ESA_RS19065	4086007	4086399	-
ESA_RS14565	3083574	3082717	+
ESA_RS13675	2924258	2926083	-
ESA_RS02320	488792	489241	-
ESA_RS20150	4332248	4330908	+
ESA_RS06890	1446506	1447204	-
ESA_RS11920	2542784	2543824	-
ESA_RS10510	2223954	2224529	-
ESA_RS04440	941473	944322	-
ESA_RS11470	2439546	2440772	-
ESA_RS13655	2921740	2922174	-
ESA_RS13565	2900687	2899287	+
ESA_RS15740	3366307	3365084	+
ESA_RS11120	2355755	2353947	+
ESA_RS19500	4186956	4185604	+
ESA_RS16955	3622391	3623524	-
ESA_RS17160	3666154	3665549	+
ESA_RS09495	2007962	2007498	+
ESA_RS02865	605019	605309	-
ESA_RS04380	926508	925528	+
ESA_RS02605	546781	547347	-
ESA_RS07935	1672471	1672133	+
ESA_RS03610	773334	774938	-
ESA_RS06385	1345995	1347806	-
ESA_RS06770	1424503	1422569	+
ESA_RS19145	4102229	4101363	+
ESA_RS11070	2340624	2341769	-
ESA_RS03500	747591	749618	-
ESA_RS11950	2549645	2548584	+
ESA_RS07315	1548877	1547987	+
ESA_RS03570	764162	763212	+
ESA_RS13605	2911122	2910367	+
ESA_RS14835	3149729	3151099	-
ESA_RS00985	194765	193911	+
ESA_RS18260	3912332	3911013	+
ESA_RS16930	3618157	3620058	-
ESA_RS18880	4049440	4050093	-
ESA_RS16070	3443072	3441942	+
ESA_RS04375	925513	925082	+
ESA_RS01610	330616	331629	-
ESA_RS05010	1056635	1056234	+
ESA_RS06805	1430768	1430100	+
ESA_RS12125	2584681	2584025	+
ESA_RS00170	19989	19474	+
ESA_RS20190	4341034	4342254	-
ESA_RS08995	1902839	1901442	+
ESA_RS16420	3511518	3511042	+
ESA_RS16255	3479335	3478475	+
ESA_RS19205	4117549	4116008	+
ESA_RS07950	1674584	1673763	+
ESA_RS12820	2727731	2728531	-
ESA_RS16245	3476718	3475819	+
ESA_RS06085	1283627	1282284	+
ESA_RS14715	3118924	3119403	-
ESA_RS13720	2938005	2939087	-
ESA_RS08520	1796685	1797422	-
ESA_RS18545	3971293	3972180	-
ESA_RS16100	3448820	3448278	+
ESA_RS10545	2231957	2233114	-
ESA_RS09510	2009413	2009691	-
ESA_RS11530	2453793	2452873	+
ESA_RS08570	1805300	1805809	-
ESA_RS18415	3944324	3943365	+
ESA_RS12200	2602986	2603753	-
ESA_RS11730	2506266	2506964	-
ESA_RS17905	3836141	3835722	+
ESA_RS14950	3175296	3174052	+
ESA_RS07975	1680266	1680958	-
ESA_RS17780	3809204	3809866	-
ESA_RS09975	2119503	2120786	-
ESA_RS15690	3354579	3353509	+
ESA_RS05560	1181985	1183457	-
ESA_RS12510	2665141	2665551	-
ESA_RS17425	3727686	3726211	+
ESA_RS04955	1044673	1043843	+
ESA_RS07795	1643312	1641657	+
ESA_RS12465	2654284	2655090	-
ESA_RS07745	1628969	1631611	-
ESA_RS09100	1925301	1927631	-
ESA_RS18230	3906338	3907054	-
ESA_RS12490	2660781	2659936	+
ESA_RS06045	1275776	1275279	+
ESA_RS16725	3575893	3575318	+
ESA_RS00445	81985	83064	-
ESA_RS09925	2109237	2108686	+
ESA_RS18380	3936459	3937028	-
ESA_RS00815	161565	162911	-
ESA_RS16425	3511766	3513199	-
ESA_RS19010	4075077	4076096	-
ESA_RS16695	3567080	3566148	+
ESA_RS12180	2597002	2599197	-
ESA_RS19455	4175516	4177573	-
ESA_RS10330	2190737	2189784	+
ESA_RS07210	1523520	1524494	-
ESA_RS14450	3057860	3058264	-
ESA_RS12485	2659932	2658817	+
ESA_RS03320	702724	701360	+
ESA_RS17895	3833871	3834881	-
ESA_RS22480	3841464	3841144	+
ESA_RS02330	492093	493391	-
ESA_RS07695	1615420	1616277	-
ESA_RS00355	63742	62552	+
ESA_RS12525	2669322	2667757	+
ESA_RS09940	2112392	2113033	-
ESA_RS19860	4263526	4264521	-
ESA_RS17610	3774660	3772228	+
ESA_RS06860	1441469	1442326	-
ESA_RS09905	2104789	2105202	-
ESA_RS01070	215841	216830	-
ESA_RS09525	2011912	2013987	-
ESA_RS19290	4134818	4134069	+
ESA_RS01195	242753	241806	+
ESA_RS02205	461301	464189	-
ESA_RS07690	1613904	1615016	-
ESA_RS00995	197422	195479	+
ESA_RS02440	518264	518974	-
ESA_RS15605	3330134	3330607	-
ESA_RS05630	1199611	1198814	+
ESA_RS09460	2000854	2000447	+
ESA_RS02720	569284	571161	-
ESA_RS05005	1056237	1055542	+
ESA_RS13495	2883840	2882620	+
ESA_RS11865	2533094	2532093	+
ESA_RS15025	3192857	3194257	-
ESA_RS04940	1040990	1039941	+
ESA_RS01565	322171	321623	+
ESA_RS00300	49564	50349	-
ESA_RS10045	2131241	2130273	+
ESA_RS02370	503856	504545	-
ESA_RS04995	1054403	1053690	+
ESA_RS17785	3809866	3810189	-
ESA_RS09235	1952195	1951029	+
ESA_RS16525	3527878	3528435	-
ESA_RS00705	143910	142882	+
ESA_RS12345	2631457	2632197	-
ESA_RS03770	805459	804488	+
ESA_RS19440	4171936	4173426	-
ESA_RS18680	4006069	4004039	+
ESA_RS05195	1094642	1095439	-
ESA_RS18990	4073606	4072059	+
ESA_RS17760	3805171	3803909	+
ESA_RS12705	2701748	2702614	-
ESA_RS10880	2301880	2302380	-
ESA_RS13650	2921641	2920706	+
ESA_RS06230	1312916	1314502	-
ESA_RS01870	389802	390437	-
ESA_RS13425	2871147	2870623	+
ESA_RS14345	3037330	3039774	-
ESA_RS07045	1488771	1486093	+
ESA_RS01920	399116	400318	-
ESA_RS09475	2004040	2002331	+
ESA_RS19960	4291132	4293240	-
ESA_RS01800	372067	371336	+
ESA_RS11590	2473742	2472171	+
ESA_RS02225	471156	472409	-
ESA_RS19200	4116030	4114840	+
ESA_RS07275	1538518	1538336	+
ESA_RS01645	337231	340068	-
ESA_RS16135	3455992	3456360	-
ESA_RS16000	3423760	3424764	-
ESA_RS13115	2797210	2798256	-
ESA_RS14365	3041733	3042209	-
ESA_RS04030	853254	852703	+
ESA_RS09585	2035710	2035294	+
ESA_RS07925	1670330	1670749	-
ESA_RS01745	362910	361774	+
ESA_RS00970	192486	191905	+
ESA_RS01185	240192	238531	+
ESA_RS11220	2379893	2379201	+
ESA_RS10820	2288243	2289427	-
ESA_RS04245	896286	895072	+
ESA_RS05265	1118510	1115121	+
ESA_RS09420	1992814	1990667	+
ESA_RS11170	2367008	2366826	+
ESA_RS14960	3177697	3176615	+
ESA_RS06475	1364169	1361536	+
ESA_RS10975	2319313	2317259	+
ESA_RS02135	446304	447497	-
ESA_RS12135	2586877	2585456	+
ESA_RS05680	1208875	1209372	-
ESA_RS00280	46709	45117	+
ESA_RS15080	3207059	3207754	-
ESA_RS01590	325967	325545	+
ESA_RS03925	834222	834992	-
ESA_RS06255	1319569	1320111	-
ESA_RS01735	359192	359929	-
ESA_RS15085	3207888	3210248	-
ESA_RS08665	1826101	1825442	+
ESA_RS15130	3220937	3221788	-
ESA_RS18725	4013592	4014029	-
ESA_RS05060	1064550	1063996	+
ESA_RS03150	663038	662190	+
ESA_RS19210	4118609	4117617	+
ESA_RS21530	741322	741501	-
ESA_RS11365	2420843	2420013	+
ESA_RS11350	2416045	2417763	-
ESA_RS03130	659953	660690	-
ESA_RS09930	2109412	2111262	-
ESA_RS20155	4333906	4332533	+
ESA_RS07260	1536618	1534186	+
ESA_RS19030	4079702	4079004	+
ESA_RS14965	3179049	3177691	+
ESA_RS15145	3225327	3223465	+
ESA_RS03725	796095	797111	-
ESA_RS04410	932412	933470	-
ESA_RS00755	150447	151424	-
ESA_RS10180	2157917	2158729	-
ESA_RS12825	2728733	2729212	-
ESA_RS07595	1593637	1594719	-
ESA_RS15750	3367914	3368270	-
ESA_RS00235	30419	31348	-
ESA_RS04100	869049	869708	-
ESA_RS01750	363496	362903	+
ESA_RS09515	2009691	2010812	-
ESA_RS01555	321361	320456	+
ESA_RS00385	71948	69522	+
ESA_RS01220	246276	245449	+
ESA_RS18535	3968788	3970293	-
ESA_RS21630	1214648	1215169	-
ESA_RS15090	3210382	3213288	-
ESA_RS16510	3525769	3526755	-
ESA_RS19295	4135950	4134931	+
ESA_RS15565	3323085	3322804	+
ESA_RS18070	3875204	3874161	+
ESA_RS04840	1017907	1018251	-
ESA_RS11850	2529316	2529996	-
ESA_RS06015	1271815	1272363	-
ESA_RS07965	1677906	1678838	-
ESA_RS05665	1206054	1204930	+
ESA_RS05065	1066394	1064643	+
ESA_RS10525	2226911	2227288	-
ESA_RS09385	1983411	1984883	-
ESA_RS09375	1982551	1980521	+
ESA_RS03305	697491	699617	-
ESA_RS16850	3602959	3603717	-
ESA_RS15015	3190192	3191763	-
ESA_RS05055	1063062	1063994	-
ESA_RS09605	2040445	2038955	+
ESA_RS11285	2399442	2401175	-
ESA_RS03135	660765	661496	-
ESA_RS20035	4309922	4309044	+
ESA_RS07325	1551466	1549826	+
ESA_RS16005	3424813	3426216	-
ESA_RS10240	2173459	2172155	+
ESA_RS04950	1042161	1043630	-
ESA_RS07685	1613618	1612686	+
ESA_RS10170	2155931	2157079	-
ESA_RS13820	2957123	2956899	+
ESA_RS20330	4367387	4367863	-
ESA_RS12230	2610687	2609293	+
ESA_RS10865	2300082	2300480	-
ESA_RS06185	1303966	1305636	-
ESA_RS14390	3046861	3046058	+
ESA_RS04175	883299	882673	+
ESA_RS08120	1708096	1709910	-
ESA_RS10130	2145306	2147255	-
ESA_RS11540	2457570	2455696	+
ESA_RS13290	2840073	2839093	+
ESA_RS04305	908852	910690	-
ESA_RS16570	3536731	3534392	+
ESA_RS00615	123558	122692	+
ESA_RS19505	4187873	4187031	+
ESA_RS07190	1518699	1517938	+
ESA_RS14695	3115170	3115874	-
ESA_RS19480	4182773	4182375	+
ESA_RS08945	1890753	1889365	+
ESA_RS18505	3961984	3961526	+
ESA_RS01315	262789	262169	+
ESA_RS03230	683383	684030	-
ESA_RS11870	2533246	2534064	-
ESA_RS10970	2316799	2317257	-
ESA_RS17525	3748877	3748518	+
ESA_RS09210	1947015	1948112	-
ESA_RS12835	2731387	2733069	-
ESA_RS08670	1826279	1827772	-
ESA_RS10810	2286999	2285872	+
ESA_RS11420	2429903	2428944	+
ESA_RS02295	485445	484081	+
ESA_RS07370	1558406	1559248	-
ESA_RS02635	555826	554651	+
ESA_RS01550	320413	319370	+
ESA_RS09855	2094037	2094927	-
ESA_RS17095	3653940	3652609	+
ESA_RS17290	3694139	3691593	+
ESA_RS00515	97088	97546	-
ESA_RS08135	1714441	1715712	-
ESA_RS01720	355869	355555	+
ESA_RS19225	4121937	4122479	-
ESA_RS10885	2302398	2303735	-
ESA_RS11340	2413065	2414717	-
ESA_RS20180	4339751	4340353	-
ESA_RS14320	3031951	3033408	-
ESA_RS16120	3453695	3454474	-
ESA_RS03795	810274	809942	+
ESA_RS05975	1264185	1264985	-
ESA_RS02520	534030	533326	+
ESA_RS19725	4236616	4236020	+
ESA_RS03030	638472	639773	-
ESA_RS19020	4077531	4077058	+
ESA_RS01470	304052	302967	+
ESA_RS06840	1438273	1437404	+
ESA_RS01615	332283	331666	+
ESA_RS05045	1062125	1061559	+
ESA_RS13140	2804299	2804994	-
ESA_RS06050	1276419	1276039	+
ESA_RS11225	2380035	2381798	-
ESA_RS09520	2010809	2011819	-
ESA_RS19955	4288718	4291120	-
ESA_RS16840	3600669	3601850	-
ESA_RS18955	4065056	4064010	+
ESA_RS07855	1652699	1654396	-
ESA_RS14665	3106182	3105286	+
ESA_RS19135	4099819	4100754	-
ESA_RS18310	3924049	3922949	+
ESA_RS02670	563107	562145	+
ESA_RS08000	1684855	1685190	-
ESA_RS02410	513022	514437	-
ESA_RS05505	1170216	1171040	-
ESA_RS16240	3474809	3475822	-
ESA_RS16715	3573782	3569982	+
ESA_RS06715	1411084	1409519	+
ESA_RS02310	487665	487994	-
ESA_RS04220	890743	891198	-
ESA_RS05235	1107540	1104451	+
ESA_RS17085	3651958	3650507	+
ESA_RS02005	417306	418823	-
ESA_RS00660	133899	133324	+
ESA_RS16580	3538383	3542921	-
ESA_RS10955	2314630	2315820	-
ESA_RS12575	2680611	2682884	-
ESA_RS22120	3196507	3196343	+
ESA_RS22450	2119589	2119397	+
ESA_RS11845	2527956	2529248	-
ESA_RS10270	2177524	2177165	+
ESA_RS19710	4234955	4234329	+
ESA_RS18515	3964583	3963132	+
ESA_RS14940	3172920	3171454	+
ESA_RS03225	683257	681977	+
ESA_RS00745	148361	147615	+
ESA_RS03915	831721	832500	-
ESA_RS17200	3676080	3675280	+
ESA_RS00185	21700	22257	-
ESA_RS01995	414368	416101	-
ESA_RS09590	2036942	2035722	+
ESA_RS15625	3332408	3333145	-
ESA_RS17370	3713696	3713013	+
ESA_RS01410	291982	291287	+
ESA_RS05155	1086290	1087015	-
ESA_RS10325	2189766	2188837	+
ESA_RS15645	3340641	3338974	+
ESA_RS14995	3185651	3184647	+
ESA_RS17850	3823042	3822443	+
ESA_RS08795	1859054	1857156	+
ESA_RS00895	181591	179660	+
ESA_RS03315	701267	700419	+
ESA_RS07230	1530020	1530328	-
ESA_RS00990	194854	195234	-
ESA_RS17720	3795263	3796300	-
ESA_RS05515	1172070	1173365	-
ESA_RS06655	1398629	1400347	-
ESA_RS18100	3882244	3880313	+
ESA_RS11595	2474896	2473739	+
ESA_RS13465	2878425	2877232	+
ESA_RS07955	1676460	1674976	+
ESA_RS21810	1833477	1831864	+
ESA_RS00435	80297	79314	+
ESA_RS17210	3677232	3677852	-
ESA_RS17560	3756929	3755925	+
ESA_RS06305	1330132	1329314	+
ESA_RS01740	359977	361389	-
ESA_RS15050	3199387	3200997	-
ESA_RS11260	2391166	2390552	+
ESA_RS19945	4284451	4285209	-
ESA_RS17410	3721916	3723400	-
ESA_RS09505	2008550	2009422	-
ESA_RS19675	4227521	4226964	+
ESA_RS18790	4031605	4029485	+
ESA_RS01485	305301	306017	-
ESA_RS08940	1888293	1889249	-
ESA_RS09055	1916601	1918190	-
ESA_RS03450	738705	739406	-
ESA_RS20235	4349808	4351298	-
ESA_RS00270	43928	43656	+
ESA_RS10165	2155643	2154414	+
ESA_RS06935	1459005	1461707	-
ESA_RS19685	4228466	4228711	-
ESA_RS19525	4191801	4192136	-
ESA_RS13585	2905838	2906860	-
ESA_RS08585	1807325	1807969	-
ESA_RS16095	3446998	3448245	-
ESA_RS11445	2434920	2434198	+
ESA_RS11495	2445379	2445972	-
ESA_RS18200	3900132	3901310	-
ESA_RS11140	2363147	2362368	+
ESA_RS06010	1269926	1271758	-
ESA_RS01430	296208	297239	-
ESA_RS03405	726064	727641	-
ESA_RS06680	1403568	1403843	-
ESA_RS12130	2585445	2584702	+
ESA_RS19835	4258626	4258159	+
ESA_RS11440	2434120	2433218	+
ESA_RS03600	771970	771011	+
ESA_RS13600	2909477	2908554	+
ESA_RS18610	3984464	3985087	-
ESA_RS10470	2217127	2218335	-
ESA_RS11780	2516922	2516470	+
ESA_RS07010	1479192	1478734	+
ESA_RS06000	1268789	1268565	+
ESA_RS16250	3476821	3477522	-
ESA_RS17910	3836256	3836855	-
ESA_RS07205	1520735	1523332	-
ESA_RS07985	1682881	1682234	+
ESA_RS06605	1388671	1389477	-
ESA_RS18490	3958669	3958046	+
ESA_RS11355	2417798	2418805	-
ESA_RS17730	3798056	3797220	+
ESA_RS16535	3529263	3530702	-
ESA_RS16685	3564091	3562637	+
ESA_RS03865	820603	819614	+
ESA_RS00980	193813	193442	+
ESA_RS09880	2099766	2098441	+
ESA_RS07900	1664631	1665224	-
ESA_RS06470	1361458	1360016	+
ESA_RS09595	2038213	2036939	+
ESA_RS11510	2448302	2448928	-
ESA_RS00675	137422	136121	+
ESA_RS11945	2548562	2547843	+
ESA_RS19930	4282968	4281451	+
ESA_RS16830	3598872	3599093	-
ESA_RS05880	1245661	1244444	+
ESA_RS16150	3457096	3457392	-
ESA_RS15120	3219731	3220552	-
ESA_RS14620	3095881	3094454	+
ESA_RS15665	3348553	3347285	+
ESA_RS14445	3056932	3057747	-
ESA_RS04825	1015482	1013722	+
ESA_RS07345	1553679	1554035	-
ESA_RS13800	2951207	2953351	-
ESA_RS01830	379484	380404	-
ESA_RS04015	848476	849786	-
ESA_RS12450	2651615	2651376	+
ESA_RS03980	841242	843191	-
ESA_RS05160	1087126	1088670	-
ESA_RS12790	2720134	2721051	-
ESA_RS00535	103069	101774	+
ESA_RS16585	3542935	3544353	-
ESA_RS09010	1906125	1907678	-
ESA_RS05225	1103035	1101611	+
ESA_RS02925	615457	615897	-
ESA_RS09685	2063750	2063286	+
ESA_RS01175	237887	237006	+
ESA_RS19265	4129447	4129605	-
ESA_RS15765	3371885	3371391	+
ESA_RS08575	1805883	1806788	-
ESA_RS13435	2872737	2872282	+
ESA_RS11390	2423511	2424227	-
ESA_RS12770	2717715	2717029	+
ESA_RS00575	112188	114503	-
ESA_RS20005	4302207	4299880	+
ESA_RS07180	1516211	1517296	-
ESA_RS17725	3797148	3796297	+
ESA_RS08700	1834593	1833553	+
ESA_RS13430	2871509	2872285	-
ESA_RS10245	2174238	2173696	+
ESA_RS03215	680340	680717	-
ESA_RS06960	1466493	1467899	-
ESA_RS21870	2216818	2217030	-
ESA_RS14375	3042955	3043710	-
ESA_RS12870	2742552	2740678	+
ESA_RS09890	2102275	2101238	+
ESA_RS14475	3062557	3062012	+
ESA_RS00820	162921	164828	-
ESA_RS19315	4140420	4139980	+
ESA_RS12815	2724952	2727459	-
ESA_RS07185	1517941	1517351	+
ESA_RS04395	928881	929423	-
ESA_RS11775	2516375	2515668	+
ESA_RS16620	3552850	3552359	+
ESA_RS06500	1369100	1369981	-
ESA_RS01730	356682	358952	-
ESA_RS11795	2518163	2517651	+
ESA_RS17115	3658705	3658004	+
ESA_RS17090	3652609	3651998	+
ESA_RS16780	3586318	3586560	-
ESA_RS00765	155898	154936	+
ESA_RS07290	1543846	1541912	+
ESA_RS08305	1749394	1748195	+
ESA_RS19015	4076173	4076994	-
ESA_RS14890	3161275	3162018	-
ESA_RS11165	2366829	2366083	+
ESA_RS15965	3396383	3395577	+
ESA_RS13735	2941494	2940907	+
ESA_RS11405	2427501	2426374	+
ESA_RS15920	3406752	3405109	+
ESA_RS02700	567466	567011	+
ESA_RS08645	1820302	1821906	-
ESA_RS11885	2536584	2535808	+
ESA_RS01225	247545	246382	+
ESA_RS15250	3251889	3250993	+
ESA_RS12455	2652354	2651776	+
ESA_RS11090	2346694	2347896	-
ESA_RS11320	2408874	2407762	+
ESA_RS03155	663160	664053	-
ESA_RS08130	1713704	1714405	-
ESA_RS15700	3356122	3355652	+
ESA_RS20185	4340384	4340947	-
ESA_RS02215	467725	469560	-
ESA_RS00255	37501	36662	+
ESA_RS19785	4249507	4250787	-
ESA_RS10205	2163707	2163003	+
ESA_RS10025	2127239	2126934	+
ESA_RS11810	2522673	2520652	+
ESA_RS03295	694263	695060	-
ESA_RS16760	3583068	3583670	-
ESA_RS17515	3747015	3745165	+
ESA_RS12520	2667103	2667531	-
ESA_RS12350	2632197	2632871	-
ESA_RS13545	2896026	2895199	+
ESA_RS06565	1379472	1381031	-
ESA_RS01075	216941	218506	-
ESA_RS03780	806598	807557	-
ESA_RS05905	1249280	1250116	-
ESA_RS03650	782136	780901	+
ESA_RS14430	3055021	3054461	+
ESA_RS00730	146727	146194	+
ESA_RS19695	4229931	4230440	-
ESA_RS03545	757853	758896	-
ESA_RS10415	2209695	2208466	+
ESA_RS08315	1751381	1750437	+
ESA_RS06505	1370234	1371025	-
ESA_RS07910	1667345	1666140	+
ESA_RS12735	2707954	2708676	-
ESA_RS07995	1684526	1683813	+
ESA_RS12850	2736928	2735774	+
ESA_RS06420	1354538	1353876	+
ESA_RS04115	872108	872830	-
ESA_RS05025	1057606	1058538	-
ESA_RS05180	1092964	1092638	+
ESA_RS13575	2903942	2904430	-
ESA_RS16260	3479398	3481458	-
ESA_RS08910	1882361	1883410	-
ESA_RS16130	3455456	3455839	-
ESA_RS02290	483630	482344	+
ESA_RS15930	3408426	3407345	+
ESA_RS13475	2879433	2880533	-
ESA_RS01925	400741	401838	-
ESA_RS09645	2054566	2052188	+
ESA_RS01065	214832	215854	-
ESA_RS12105	2581580	2580858	+
ESA_RS09280	1962102	1961452	+
ESA_RS13450	2873829	2874638	-
ESA_RS06480	1365421	1364138	+
ESA_RS18395	3940754	3939582	+
ESA_RS00530	100095	101741	-
ESA_RS17565	3757110	3758261	-
ESA_RS11250	2389099	2387807	+
ESA_RS16895	3613571	3612915	+
ESA_RS12550	2673499	2674188	-
ESA_RS19250	4125920	4127989	-
ESA_RS09480	2004982	2004056	+
ESA_RS12750	2711777	2710632	+
ESA_RS03565	763191	761197	+
ESA_RS08595	1809510	1810967	-
ESA_RS09630	2046783	2047901	-
ESA_RS03930	835973	835278	+
ESA_RS05075	1069042	1069950	-
ESA_RS07310	1547987	1546995	+
ESA_RS10850	2298003	2297365	+
ESA_RS16950	3621624	3622394	-
ESA_RS11280	2397675	2399441	-
ESA_RS15660	3347251	3346016	+
ESA_RS01790	370262	369699	+
ESA_RS07120	1504985	1504449	+
ESA_RS14910	3165944	3165441	+
ESA_RS08615	1814235	1815074	-
ESA_RS19050	4082759	4083748	-
ESA_RS18520	3966076	3964577	+
ESA_RS02395	509152	510864	-
ESA_RS11805	2519519	2520427	-
ESA_RS01190	241671	240253	+
ESA_RS08990	1900512	1901441	-
ESA_RS05205	1096374	1097426	-
ESA_RS06290	1328070	1327099	+
ESA_RS06875	1443575	1444429	-
ESA_RS11410	2428027	2427554	+
ESA_RS19870	4265194	4266534	-
ESA_RS09900	2103934	2104740	-
ESA_RS18620	3986452	3989235	-
ESA_RS08620	1815034	1815900	-
ESA_RS20165	4337136	4334590	+
ESA_RS04110	870850	872118	-
ESA_RS10305	2186255	2185455	+
ESA_RS03590	769633	768626	+
ESA_RS04910	1033897	1032716	+
ESA_RS08495	1792003	1791578	+
ESA_RS17440	3732234	3730384	+
ESA_RS16460	3517942	3519054	-
ESA_RS12110	2581825	2582373	-
ESA_RS01460	302644	301562	+
ESA_RS11485	2444475	2443243	+
ESA_RS01760	364352	363798	+
ESA_RS09910	2105443	2105162	+
ESA_RS00395	72558	73166	-
ESA_RS06980	1474302	1474979	-
ESA_RS13775	2946826	2947884	-
ESA_RS10365	2195745	2198921	-
ESA_RS02130	444152	446311	-
ESA_RS16075	3443158	3443670	-
ESA_RS11290	2401213	2401917	-
ESA_RS06555	1377982	1377182	+
ESA_RS06575	1384129	1382765	+
ESA_RS04150	878620	879336	-
ESA_RS01200	243618	243001	+
ESA_RS12875	2743315	2742710	+
ESA_RS18950	4064006	4063005	+
ESA_RS06905	1449978	1449625	+
ESA_RS04010	848024	848308	-
ESA_RS19170	4105040	4106443	-
ESA_RS09570	2032052	2033464	-
ESA_RS07765	1633202	1632597	+
ESA_RS11005	2325391	2324936	+
ESA_RS12475	2657152	2655476	+
ESA_RS20080	4318668	4319078	-
ESA_RS17305	3696121	3697317	-
ESA_RS16555	3532496	3532768	-
ESA_RS04090	867198	868211	-
ESA_RS18900	4052135	4051656	+
ESA_RS12235	2612797	2611130	+
ESA_RS08845	1866963	1865818	+
ESA_RS19335	4143244	4143675	-
ESA_RS00750	150144	148354	+
ESA_RS10210	2164899	2163700	+
ESA_RS13455	2876094	2874676	+
ESA_RS15655	3345348	3342301	+
ESA_RS19530	4193689	4192187	+
ESA_RS01915	397927	399105	-
ESA_RS20095	4321111	4322199	-
ESA_RS05540	1179366	1179839	-
ESA_RS00305	51725	50373	+
ESA_RS12270	2620105	2621769	-
ESA_RS02495	527815	527405	+
ESA_RS16315	3487796	3488791	-
ESA_RS08345	1757225	1757572	-
ESA_RS06260	1320115	1321281	-
ESA_RS11770	2514422	2515450	-
ESA_RS19915	4276776	4279223	-
ESA_RS02530	536184	535972	+
ESA_RS13410	2869358	2869074	+
ESA_RS17855	3823199	3824068	-
ESA_RS10290	2183794	2182787	+
ESA_RS16300	3486236	3486523	-
ESA_RS19075	4086927	4087607	-
ESA_RS15470	3306576	3305605	+
ESA_RS12400	2642248	2643360	-
ESA_RS11535	2455666	2454128	+
ESA_RS07740	1628757	1627768	+
ESA_RS05300	1125962	1128124	-
ESA_RS04430	938491	937760	+
ESA_RS15545	3321246	3322274	-
ESA_RS03445	737320	738609	-
ESA_RS07015	1479547	1480560	-
ESA_RS07850	1651417	1652535	-
ESA_RS12765	2717032	2714618	+
ESA_RS18225	3906116	3904500	+
ESA_RS03385	721879	721529	+
ESA_RS07060	1492392	1493312	-
ESA_RS08145	1717458	1718531	-
ESA_RS06400	1349868	1350218	-
ESA_RS13620	2913436	2912219	+
ESA_RS10125	2144588	2145037	-
ESA_RS01625	332878	333696	-
ESA_RS13105	2796575	2794800	+
ESA_RS06295	1328810	1328067	+
ESA_RS01525	314058	314600	-
ESA_RS00805	159568	161097	-
ESA_RS09770	2079917	2078412	+
ESA_RS04905	1032465	1032719	-
ESA_RS15220	3245480	3244530	+
ESA_RS13440	2873192	2872737	+
ESA_RS20025	4306878	4305259	+
ESA_RS00275	44954	44019	+
ESA_RS10150	2150781	2151452	-
ESA_RS11360	2418935	2419951	-
ESA_RS08125	1709921	1713529	-
ESA_RS17605	3771926	3771021	+
ESA_RS15580	3326628	3325282	+
ESA_RS19845	4261254	4260757	+
ESA_RS11555	2460862	2459792	+
ESA_RS18860	4046195	4046836	-
ESA_RS11435	2433137	2432658	+
ESA_RS13715	2937765	2934634	+
ESA_RS12015	2556914	2556621	+
ESA_RS16205	3467212	3467604	-
ESA_RS09275	1960515	1961435	-
ESA_RS04190	884754	885338	-
ESA_RS16320	3488802	3489680	-
ESA_RS19195	4114741	4113563	+
ESA_RS03200	678274	677084	+
ESA_RS14840	3151256	3152656	-
ESA_RS10755	2273120	2272695	+
ESA_RS01980	412624	412103	+
ESA_RS08405	1775936	1774386	+
ESA_RS18855	4045414	4046130	-
ESA_RS11150	2364929	2364036	+
ESA_RS10515	2225634	2224585	+
ESA_RS12745	2709315	2710382	-
ESA_RS04475	952779	954425	-
ESA_RS16640	3556033	3554897	+
ESA_RS01770	365097	366113	-
ESA_RS13740	2941637	2942041	-
ESA_RS14350	3039880	3040650	-
ESA_RS16295	3486170	3485736	+
ESA_RS13245	2831119	2830628	+
ESA_RS16045	3434435	3432888	+
ESA_RS16440	3516159	3514987	+
ESA_RS11585	2472169	2470628	+
ESA_RS19740	4239008	4240078	-
ESA_RS13560	2899300	2898368	+
ESA_RS09485	2006810	2004984	+
ESA_RS06720	1411378	1412676	-
ESA_RS07090	1498998	1497538	+
ESA_RS15070	3203748	3205460	-
ESA_RS12265	2619054	2619806	-
ESA_RS01240	250614	249429	+
ESA_RS15045	3198428	3199411	-
ESA_RS16705	3567466	3568410	-
ESA_RS03360	716539	717813	-
ESA_RS00545	105175	104861	+
ESA_RS08065	1697302	1697099	+
ESA_RS01630	334949	333702	+
ESA_RS05070	1066588	1068885	-
ESA_RS13525	2890470	2891447	-
ESA_RS13240	2829199	2830563	-
ESA_RS15035	3196223	3195045	+
ESA_RS03685	789852	790871	-
ESA_RS04860	1023779	1021974	+
ESA_RS18665	4001666	4000236	+
ESA_RS15755	3368646	3370064	-
ESA_RS18715	4012133	4012732	-
ESA_RS15535	3320755	3320318	+
ESA_RS11500	2446052	2446816	-
ESA_RS10505	2223385	2223939	-
ESA_RS07770	1633407	1637312	-
ESA_RS08900	1879906	1880754	-
ESA_RS16665	3560769	3561239	-
ESA_RS10175	2157063	2157920	-
ESA_RS01910	396614	397930	-
ESA_RS16485	3522367	3521732	+
ESA_RS16515	3526771	3527337	-
ESA_RS18355	3933171	3932449	+
ESA_RS02110	441054	441371	-
ESA_RS11905	2539566	2540582	-
ESA_RS09260	1956369	1957517	-
ESA_RS13630	2914718	2915341	-
ESA_RS04250	897238	898173	-
ESA_RS11860	2530599	2531906	-
ESA_RS03085	652099	650480	+
ESA_RS03380	721311	721532	-
ESA_RS12260	2617771	2618991	-
ESA_RS06395	1349735	1348557	+
ESA_RS16285	3485093	3484443	+
ESA_RS20230	4348939	4349796	-
ESA_RS13540	2895202	2894351	+
ESA_RS11765	2513181	2514422	-
ESA_RS12985	2768710	2769513	-
ESA_RS05365	1140309	1141703	-
ESA_RS00380	68368	69240	-
ESA_RS15675	3351685	3350222	+
ESA_RS18640	3994522	3993113	+
ESA_RS13615	2911801	2912160	-
ESA_RS00960	189152	190825	-
ESA_RS16945	3621422	3621622	-
ESA_RS02405	512777	511788	+
ESA_RS16090	3445735	3446703	-
ESA_RS15975	3397659	3397240	+
ESA_RS02455	520880	521641	-
ESA_RS09440	1998430	1996280	+
ESA_RS09380	1982803	1983411	-
ESA_RS15845	3388230	3387118	+
ESA_RS17120	3660235	3658751	+
ESA_RS02500	527987	528604	-
ESA_RS10830	2291505	2289997	+
ESA_RS13080	2789785	2789213	+
ESA_RS06440	1356251	1356589	-
ESA_RS17345	3708175	3707435	+
ESA_RS02515	533075	530514	+
ESA_RS01235	249311	248658	+
ESA_RS17350	3709555	3708191	+
ESA_RS15980	3397823	3398827	-
ESA_RS01940	405423	406166	-
ESA_RS10235	2171970	2171431	+
ESA_RS07790	1641619	1640537	+
ESA_RS17680	3788328	3788690	-
ESA_RS17615	3775824	3774670	+
ESA_RS03055	645511	645080	+
ESA_RS15150	3225850	3225320	+
ESA_RS12355	2632871	2633596	-
ESA_RS00540	104867	103218	+
ESA_RS18265	3913761	3912469	+
ESA_RS13795	2950074	2951210	-
ESA_RS11110	2353180	2352533	+
ESA_RS15680	3351996	3353018	-
ESA_RS04975	1048039	1049064	-
ESA_RS17185	3673103	3670842	+
ESA_RS01530	315459	314488	+
ESA_RS11245	2387511	2386363	+
ESA_RS01540	318102	316927	+
ESA_RS19720	4236030	4235761	+
ESA_RS02115	441433	442206	-
ESA_RS02935	617517	618587	-
ESA_RS03100	653781	654734	-
ESA_RS01265	254308	253889	+
ESA_RS15475	3306683	3307345	-
ESA_RS01290	258639	257260	+
ESA_RS10120	2143921	2144577	-
ESA_RS20020	4303852	4305198	-
ESA_RS00850	170020	170217	-
ESA_RS10875	2301280	2301870	-
ESA_RS18090	3879503	3878499	+
ESA_RS09455	2000454	1999981	+
ESA_RS18625	3990173	3989538	+
ESA_RS18630	3990764	3991294	-
ESA_RS07820	1645955	1647394	-
ESA_RS03075	649629	648295	+
ESA_RS05050	1062308	1062895	-
ESA_RS00330	56178	58274	-
ESA_RS10445	2212452	2212877	-
ESA_RS15995	3422812	3423723	-
ESA_RS20000	4299210	4298986	+
ESA_RS11750	2510803	2511909	-
ESA_RS11515	2450041	2448929	+
ESA_RS11545	2457806	2459035	-
ESA_RS18905	4052907	4052140	+
ESA_RS10360	2195177	2194224	+
ESA_RS02315	487991	488788	-
ESA_RS20145	4330886	4329864	+
ESA_RS11400	2425246	2425977	-
ESA_RS03290	692658	693944	-
ESA_RS03140	661496	661876	-
ESA_RS07885	1661137	1662792	-
ESA_RS00350	62286	60742	+
ESA_RS16290	3485238	3485756	-
ESA_RS05875	1244447	1244214	+
ESA_RS07165	1514310	1512748	+
ESA_RS17225	3681299	3680430	+
ESA_RS16400	3507692	3506844	+
ESA_RS11135	2362364	2361042	+
ESA_RS15890	3397823	3398827	-
ESA_RS19425	4164684	4168187	-
ESA_RS08085	1700041	1702086	-
ESA_RS08860	1870381	1871391	-
ESA_RS10200	2163003	2161759	+
ESA_RS17375	3714980	3713718	+
ESA_RS02390	507350	509152	-
ESA_RS07635	1602717	1604333	-
ESA_RS01005	198934	198377	+
ESA_RS14970	3180533	3179046	+
ESA_RS07750	1631608	1631799	-
ESA_RS10355	2194099	2193383	+
ESA_RS18740	4018516	4017116	+
ESA_RS17630	3776931	3779126	-
ESA_RS02540	537198	537962	-
ESA_RS16125	3454790	3455452	-
ESA_RS09150	1936868	1936545	+
ESA_RS01310	261188	262141	-
ESA_RS19310	4137678	4140011	-
ESA_RS18390	3938568	3939233	-
ESA_RS11315	2407765	2405822	+
ESA_RS12460	2652815	2654176	-
ESA_RS17360	3711875	3710625	+
ESA_RS08380	1767539	1765899	+
ESA_RS09840	2090171	2092426	-
ESA_RS13380	2861780	2860467	+
ESA_RS00410	75611	75096	+
ESA_RS15020	3191763	3192854	-
ESA_RS18285	3917393	3916710	+
ESA_RS18700	4010069	4009170	+
ESA_RS19350	4146251	4145793	+
ESA_RS02095	437997	436960	+
ESA_RS09090	1924149	1924730	-
ESA_RS11415	2428947	2428102	+
ESA_RS02240	472896	473993	-
ESA_RS19825	4256352	4257425	-
ESA_RS02710	568566	568387	+
ESA_RS04405	931050	932402	-
ESA_RS17770	3808477	3807470	+
ESA_RS16470	3520995	3519736	+
ESA_RS19670	4225735	4226925	-
ESA_RS00500	94497	94219	+
ESA_RS01400	288339	287620	+
ESA_RS08415	1779084	1777270	+
ESA_RS16505	3524777	3525754	-
ESA_RS08925	1886111	1885548	+
ESA_RS06345	1337209	1336424	+
ESA_RS18250	3910022	3908760	+
ESA_RS00735	147209	146850	+
ESA_RS03020	637740	635947	+
ESA_RS12930	2757129	2753674	+
ESA_RS17340	3707209	3705824	+
ESA_RS12170	2592949	2595633	-
ESA_RS12165	2592367	2592939	-
ESA_RS17220	3680362	3678533	+
ESA_RS18660	4000161	3999475	+
ESA_RS02615	547865	549421	-
ESA_RS02525	534238	535905	-
ESA_RS04240	894991	894392	+
ESA_RS18605	3983450	3984436	-
ESA_RS16105	3450379	3448892	+
ESA_RS17355	3710628	3709552	+
ESA_RS14905	3165383	3162678	+
ESA_RS19340	4143889	4145568	-
ESA_RS07735	1627713	1627291	+
ESA_RS13210	2823713	2822013	+
ESA_RS14855	3155053	3154490	+
ESA_RS03785	807626	809644	-
ESA_RS12185	2599197	2600510	-
ESA_RS03585	768629	767637	+
ESA_RS08760	1848064	1849602	-
ESA_RS12420	2646359	2647000	-
ESA_RS20210	4346666	4345797	+
ESA_RS08110	1706114	1707217	-
ESA_RS00525	98606	99955	-
ESA_RS04415	933815	933561	+
ESA_RS06105	1286645	1288159	-
ESA_RS04930	1038178	1039008	-
ESA_RS11755	2512287	2511871	+
ESA_RS16325	3489833	3490843	-
ESA_RS05140	1082903	1084012	-
ESA_RS13345	2850463	2849393	+
ESA_RS09430	1993995	1992973	+
ESA_RS01865	388717	389655	-
ESA_RS11830	2525702	2524944	+
ESA_RS04470	952056	952700	-
ESA_RS17380	3716107	3714977	+
ESA_RS19495	4183925	4185526	-
ESA_RS15095	3213301	3213957	-
ESA_RS12100	2580861	2579875	+
ESA_RS02510	530034	530270	-
ESA_RS15715	3359399	3359082	+
ESA_RS05175	1092278	1090554	+
ESA_RS13755	2944700	2944404	+
ESA_RS07375	1559274	1560323	-
ESA_RS14455	3058261	3058968	-
ESA_RS08720	1837109	1836225	+
ESA_RS08095	1704288	1703377	+
ESA_RS01675	346061	344901	+
ESA_RS14525	3074759	3074163	+
ESA_RS08340	1756289	1757215	-
ESA_RS06330	1334042	1334563	-
ESA_RS04855	1021965	1020868	+
ESA_RS02450	519450	520499	-
ESA_RS16040	3432319	3432852	-
ESA_RS03050	645010	644309	+
ESA_RS10900	2305015	2305242	-
ESA_RS16755	3582063	3583067	-
ESA_RS11660	2488482	2488748	-
ESA_RS12715	2703105	2704604	-
ESA_RS13815	2956796	2956515	+
ESA_RS19305	4137499	4136837	+
ESA_RS12965	2764310	2764819	-
ESA_RS09710	2068925	2066538	+
ESA_RS05985	1266096	1266764	-
ESA_RS20130	4328099	4327368	+
ESA_RS10160	2153008	2154129	-
ESA_RS02855	604443	603961	+
ESA_RS15990	3421581	3422801	-
ESA_RS18270	3915231	3914083	+
ESA_RS15705	3357335	3356262	+
ESA_RS02285	482277	480910	+
ESA_RS01640	335910	337211	-
ESA_RS00800	159569	158430	+
ESA_RS06640	1395156	1397066	-
ESA_RS18910	4054226	4052907	+
ESA_RS16910	3615383	3614712	+
ESA_RS17125	3660419	3660907	-
ESA_RS10385	2203982	2202324	+
ESA_RS10475	2218410	2219057	-
ESA_RS09435	1996235	1993989	+
ESA_RS14520	3074133	3070651	+
ESA_RS00560	109793	109641	+
ESA_RS19940	4283595	4284425	-
ESA_RS20100	4322290	4323603	-
ESA_RS00370	66729	67676	-
ESA_RS13520	2889826	2890323	-
ESA_RS04990	1051964	1052974	-
ESA_RS11625	2480924	2481427	-
ESA_RS03245	686140	686877	-
ESA_RS05200	1095426	1096226	-
ESA_RS08010	1686689	1685841	+
ESA_RS10390	2205023	2204058	+
ESA_RS20225	4348742	4348023	+
ESA_RS06235	1314502	1315641	-
ESA_RS11800	2519174	2518185	+
ESA_RS17205	3677122	3676130	+
ESA_RS03375	719782	721260	-
ESA_RS04450	947815	945161	+
ESA_RS19935	4283190	4283519	-
ESA_RS05760	1221811	1220549	+
ESA_RS03630	777493	779598	-
ESA_RS02505	528594	530024	-
ESA_RS02170	454191	455066	-
ESA_RS09220	1948707	1949378	-
ESA_RS12090	2578754	2577963	+
ESA_RS07070	1494247	1495260	-
ESA_RS13025	2776525	2776274	+
ESA_RS06900	1449477	1447690	+
ESA_RS17510	3745220	3744369	+
ESA_RS17385	3717214	3716165	+
ESA_RS06485	1365550	1366044	-
ESA_RS17235	3682003	3682896	-
ESA_RS06340	1335329	1336339	-
ESA_RS06755	1419661	1418930	+
ESA_RS04060	857720	857998	-
ESA_RS05620	1198370	1197051	+
ESA_RS03740	798800	799894	-
ESA_RS00740	147615	147220	+
ESA_RS05085	1071130	1072071	-
ESA_RS17295	3694422	3695363	-
ESA_RS01875	390542	391339	-
ESA_RS00425	77747	78742	-
ESA_RS05980	1265092	1266072	-
ESA_RS04055	857146	857691	-
ESA_RS00390	72081	72449	-
ESA_RS12140	2587843	2586890	+
ESA_RS12145	2588199	2587993	+
ESA_RS11560	2461168	2462478	-
ESA_RS13020	2776277	2776056	+
ESA_RS05355	1137326	1138768	-
ESA_RS04155	879347	880120	-
ESA_RS15460	3304125	3302893	+
ESA_RS17740	3799828	3801084	-
ESA_RS07615	1598513	1600075	-
ESA_RS00415	75721	76227	-
ESA_RS00555	107652	108965	-
ESA_RS03040	641502	640147	+
ESA_RS09885	2101241	2099763	+
ESA_RS06730	1415562	1413832	+
ESA_RS19115	4095836	4094787	+
ESA_RS02940	618599	619720	-
ESA_RS10450	2214570	2213035	+
ESA_RS20205	4345345	4345752	-
ESA_RS15005	3188047	3186323	+
ESA_RS11240	2385589	2386329	-
ESA_RS12480	2658807	2657152	+
ESA_RS06585	1386246	1384882	+
ESA_RS11855	2530010	2530486	-
ESA_RS02650	558218	557034	+
ESA_RS07215	1525576	1528251	-
ESA_RS06600	1387666	1388670	-
ESA_RS10395	2206120	2205023	+
ESA_RS08150	1718531	1719328	-
ESA_RS19985	4296093	4296362	-
ESA_RS13255	2832146	2832739	-
ESA_RS03625	776567	776980	-
ESA_RS18965	4066230	4067426	-
ESA_RS12545	2672888	2673502	-
ESA_RS02275	478679	479779	-
ESA_RS09565	2031045	2029783	+
ESA_RS14605	3090334	3093009	-
ESA_RS11125	2360358	2355910	+
ESA_RS18215	3903062	3902715	+
ESA_RS14460	3059079	3060797	-
ESA_RS06310	1330695	1330129	+
ESA_RS15850	3388500	3390011	-
ESA_RS04480	955994	954501	+
ESA_RS00955	188909	188244	+
ESA_RS18275	3915845	3915228	+
ESA_RS05525	1176639	1175212	+
ESA_RS01060	213316	214818	-
ESA_RS16935	3620058	3620690	-
ESA_RS07005	1478683	1477841	+
ESA_RS16885	3609949	3611538	-
ESA_RS06460	1359539	1359348	+
ESA_RS18440	3950196	3948826	+
ESA_RS19450	4174678	4175451	-
ESA_RS08890	1877346	1878962	-
ESA_RS04850	1020871	1019846	+
ESA_RS19025	4079007	4077634	+
ESA_RS18695	4009145	4008270	+
ESA_RS10275	2177871	2180072	-
ESA_RS11745	2509672	2510793	-
ESA_RS09860	2094995	2095876	-
ESA_RS14625	3097536	3096022	+
ESA_RS21950	2457748	2457563	+
[truncated: 2 more rows]
